# Supplementary material
Source: Royal Society of Chemistry journal article supplement (doi:10.1039/d6ta03774g)
Supplement: d6ta03774g1.pdf [file d6ta03774g1.pdf]

## **Efficient Bifunctional Electrocatalysts for Oxygen Reduction/Evolution Reactions in Two-Dimensional Diamine-Based Metal–Organic Frameworks**

Cong Wang,<sup>a,\*,+</sup> Yun-Jie Chu,<sup>b,+</sup> Yi-Fei Yang,<sup>a</sup> Ling Meng,<sup>d,\*</sup> and Zhong-Min Su<sup>c</sup>

<sup>a</sup> *School of Materials Science and Engineering, Changchun University of Science and Technology, Engineering Research Center of Optoelectronic Functional Materials, Ministry of Education, Changchun 130022, China.*

<sup>b</sup> *Institute of Functional Material Chemistry, Faculty of Chemistry, Northeast Normal University, Changchun 130024, China.*

<sup>c</sup> *State Key Laboratory of Supramolecular Structure and Materials, Institute of Theoretical Chemistry, College of Chemistry, Jilin University, Changchun, 130021, China.*

<sup>d</sup> *State Key Laboratory of Chemical Resource Engineering, Beijing University of Chemical Technology, Beijing 100029, China.*

[+] These authors contributed equally to this work.

\* Corresponding author e-mail address: wangc813@cust.edu.cn; lmeng@buct.edu.cn

### Computational details.

The calculation of the Gibbs free energy diagrams was performed by using the concept of computational hydrogen electrode (CHE) model.<sup>1,2</sup> Accordingly, the Gibbs free energy change can be calculated by  $\Delta G = \Delta E + \Delta E_{\text{ZPE}} - T\Delta S$ . In this equation,  $\Delta E$  is the reaction energy directly obtained from DFT calculations.  $\Delta E_{\text{ZPE}}$  is the zero-point energy correction,  $T$  is the temperature ( $T = 298.15$  K), and  $\Delta S$  is the entropy change. The post-processing of energy corrections (zero point energy and entropy) were performed with the help of VASPKIT code.<sup>3</sup> Since the solvation-induced overpotential changes in catalytic processes are typically within 0.10 V, the solvation effects were not explicitly included in this work.<sup>4-6</sup>

The conventional four-electron ( $4e^-$ ) oxygen reduction reaction (ORR) process has four elementary steps in the acid environment as follows:

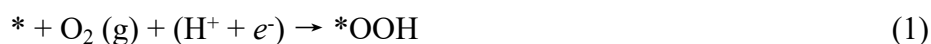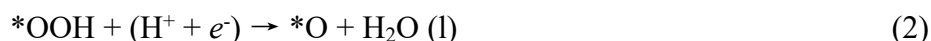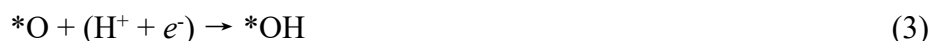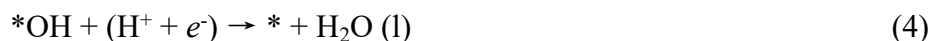

The two-electron ( $2e^-$ ) oxygen reduction reaction (ORR) process has two elementary steps in the acid environment as follows:

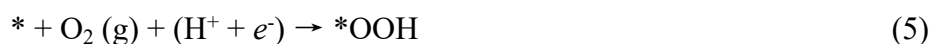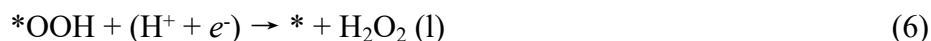

The oxygen evolution reaction (OER) process can be regarded as a reverse reaction of ORR:

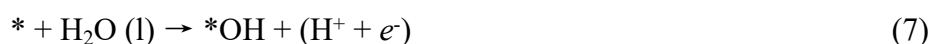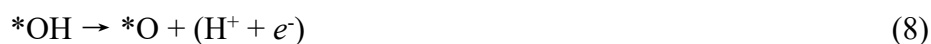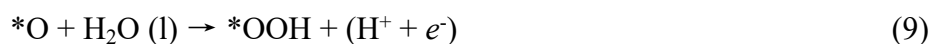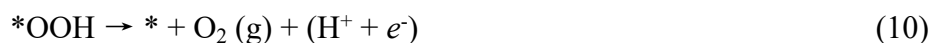

where \* denotes the activity site at the catalyst, and (g) and (l) are the gas and liquid phases.

The  $\Delta G_1 \sim \Delta G_4$  for the formation of \*OH/\*OOH, \*O/\*O, \*OOH/\*OH, and O<sub>2</sub>/H<sub>2</sub>O, and the overpotential ( $\eta$ ) of the whole OER/ORR can be calculated as follows:

$$\eta_{2e\text{-ORR}} = \frac{\max(\Delta G_i)}{e} + 0.70 \text{ V} \quad (11)$$

$$\eta_{4e\text{-ORR}} = \frac{\max(\Delta G_i)}{e} + 1.23 \text{ V} \quad (12)$$

$$\eta_{\text{OER}} = \frac{\max(\Delta G_i)}{e} - 1.23 \text{ V} \quad (13)$$

**Table S1.** The optimized lattice parameters, the TM-N bond lengths ( $d_{\text{TM-N}}$ ), the Bader charge ( $Q_{\text{TM}}$ ,  $|e|$ ) of per TM atom, the magnetic moment of per TM atom ( $\text{Mag}_{\text{TM}}$ ) and total magnetic moment ( $\text{Mag}_{\text{tot}}$ ) of the 2D  $\text{TM}_3(\text{HITT})_2$  using the PBE-D3 functional ( $c = 15 \text{ \AA}$ ,  $\alpha = \beta = 90^\circ$ ,  $\gamma = 120^\circ$ ).

| $\text{TM}_3(\text{HITT})_2$ | $a = b/\text{\AA}$ | $d_{\text{TM-N}}/\text{\AA}$ | $Q_{\text{TM}}/e$ | $\text{Mag}_{\text{TM}}/\mu_{\text{B}}$ | $\text{Mag}_{\text{tot}}/\mu_{\text{B}}$ |
|------------------------------|--------------------|------------------------------|-------------------|-----------------------------------------|------------------------------------------|
| Fe                           | 25.70              | 1.86                         | 1.18              | 2.04                                    | 5.70                                     |
| Co                           | 25.56              | 1.82                         | 0.97              | 0.86                                    | 2.81                                     |
| Ni                           | 25.52              | 1.82                         | 0.90              | 0.00                                    | 0.00                                     |
| Ru                           | 26.06              | 1.98                         | 1.09              | 1.12                                    | 3.57                                     |
| Rh                           | 25.98              | 1.96                         | 0.88              | 0.46                                    | 2.15                                     |
| Pd                           | 26.03              | 1.96                         | 0.76              | 0.00                                    | 0.00                                     |
| Os                           | 26.04              | 1.95                         | 1.10              | 0.00                                    | 0.00                                     |
| Ir                           | 26.04              | 1.96                         | 0.93              | 0.52                                    | 2.39                                     |
| Pt                           | 26.07              | 1.97                         | 0.80              | 0.00                                    | 0.00                                     |

**Table S2.** Structural information of the identified Fe<sub>3</sub>(HITT)<sub>2</sub>.

| Fe <sub>3</sub> (HITT) <sub>2</sub> | Coordinates |      |      |
|-------------------------------------|-------------|------|------|
| C                                   | 0.38        | 0.88 | 0.50 |
| C                                   | 0.12        | 0.50 | 0.50 |
| C                                   | 0.50        | 0.62 | 0.50 |
| C                                   | 0.88        | 0.38 | 0.50 |
| C                                   | 0.50        | 0.12 | 0.50 |
| C                                   | 0.62        | 0.50 | 0.50 |
| C                                   | 0.33        | 0.83 | 0.50 |
| C                                   | 0.17        | 0.50 | 0.50 |
| C                                   | 0.50        | 0.67 | 0.50 |
| C                                   | 0.83        | 0.33 | 0.50 |
| C                                   | 0.50        | 0.17 | 0.50 |
| C                                   | 0.67        | 0.50 | 0.50 |
| C                                   | 0.33        | 0.77 | 0.50 |
| C                                   | 0.23        | 0.56 | 0.50 |
| C                                   | 0.44        | 0.67 | 0.50 |
| C                                   | 0.77        | 0.33 | 0.50 |
| C                                   | 0.56        | 0.23 | 0.50 |
| C                                   | 0.67        | 0.44 | 0.50 |
| C                                   | 0.39        | 0.78 | 0.50 |
| C                                   | 0.22        | 0.61 | 0.50 |
| C                                   | 0.39        | 0.61 | 0.50 |
| C                                   | 0.78        | 0.39 | 0.50 |
| C                                   | 0.61        | 0.22 | 0.50 |
| C                                   | 0.61        | 0.39 | 0.50 |
| C                                   | 0.44        | 0.83 | 0.50 |
| C                                   | 0.17        | 0.61 | 0.50 |
| C                                   | 0.39        | 0.56 | 0.50 |
| C                                   | 0.83        | 0.44 | 0.50 |
| C                                   | 0.61        | 0.17 | 0.50 |
| C                                   | 0.56        | 0.39 | 0.50 |
| C                                   | 0.44        | 0.88 | 0.50 |
| C                                   | 0.12        | 0.56 | 0.50 |
| C                                   | 0.44        | 0.56 | 0.50 |
| C                                   | 0.88        | 0.44 | 0.50 |

---

|   |      |      |      |
|---|------|------|------|
| C | 0.56 | 0.12 | 0.50 |
| C | 0.56 | 0.44 | 0.50 |
| C | 0.39 | 0.72 | 0.50 |
| C | 0.28 | 0.67 | 0.50 |
| C | 0.33 | 0.61 | 0.50 |
| C | 0.72 | 0.39 | 0.50 |
| C | 0.67 | 0.28 | 0.50 |
| C | 0.61 | 0.33 | 0.50 |
| N | 0.28 | 0.72 | 0.50 |
| N | 0.28 | 0.56 | 0.50 |
| N | 0.44 | 0.72 | 0.50 |
| N | 0.72 | 0.28 | 0.50 |
| N | 0.56 | 0.28 | 0.50 |
| N | 0.72 | 0.44 | 0.50 |
| N | 0.39 | 0.94 | 0.50 |
| N | 0.06 | 0.45 | 0.50 |
| N | 0.55 | 0.61 | 0.50 |
| N | 0.94 | 0.39 | 0.50 |
| N | 0.45 | 0.06 | 0.50 |
| N | 0.61 | 0.55 | 0.50 |
| N | 0.49 | 0.94 | 0.50 |
| N | 0.06 | 0.55 | 0.50 |
| N | 0.45 | 0.51 | 0.50 |
| N | 0.94 | 0.49 | 0.50 |
| N | 0.55 | 0.06 | 0.50 |
| N | 0.51 | 0.45 | 0.50 |
| N | 0.33 | 0.67 | 0.50 |
| N | 0.67 | 0.33 | 0.50 |
| H | 0.29 | 0.83 | 0.50 |
| H | 0.17 | 0.46 | 0.50 |
| H | 0.54 | 0.71 | 0.50 |
| H | 0.83 | 0.29 | 0.50 |
| H | 0.46 | 0.17 | 0.50 |
| H | 0.71 | 0.54 | 0.50 |
| H | 0.49 | 0.83 | 0.50 |
| H | 0.17 | 0.66 | 0.50 |
| H | 0.34 | 0.51 | 0.50 |

---

---

|    |      |      |      |
|----|------|------|------|
| H  | 0.83 | 0.49 | 0.50 |
| H  | 0.66 | 0.17 | 0.50 |
| H  | 0.51 | 0.34 | 0.50 |
| H  | 0.59 | 0.65 | 0.50 |
| H  | 0.35 | 0.94 | 0.50 |
| H  | 0.06 | 0.41 | 0.50 |
| H  | 0.65 | 0.59 | 0.50 |
| H  | 0.94 | 0.35 | 0.50 |
| H  | 0.41 | 0.06 | 0.50 |
| H  | 0.41 | 0.47 | 0.50 |
| H  | 0.53 | 0.94 | 0.50 |
| H  | 0.06 | 0.59 | 0.50 |
| H  | 0.47 | 0.41 | 0.50 |
| H  | 0.94 | 0.53 | 0.50 |
| H  | 0.59 | 0.06 | 0.50 |
| Fe | 0.53 | 0.53 | 0.50 |
| Fe | 0.47 | 0.00 | 0.50 |
| Fe | 0.00 | 0.47 | 0.50 |

---

**Table S3.** Structural information of the identified  $\text{Co}_3(\text{HITT})_2$ .

| $\text{Co}_3(\text{HITT})_2$ | Coordinates |      |      |
|------------------------------|-------------|------|------|
| C                            | 0.39        | 0.88 | 0.50 |
| C                            | 0.12        | 0.50 | 0.50 |
| C                            | 0.50        | 0.61 | 0.50 |
| C                            | 0.88        | 0.39 | 0.50 |
| C                            | 0.50        | 0.12 | 0.50 |
| C                            | 0.61        | 0.50 | 0.50 |
| C                            | 0.33        | 0.83 | 0.50 |
| C                            | 0.17        | 0.50 | 0.50 |
| C                            | 0.50        | 0.67 | 0.50 |
| C                            | 0.83        | 0.33 | 0.50 |
| C                            | 0.50        | 0.17 | 0.50 |
| C                            | 0.67        | 0.50 | 0.50 |
| C                            | 0.33        | 0.77 | 0.50 |
| C                            | 0.23        | 0.56 | 0.50 |
| C                            | 0.44        | 0.67 | 0.50 |
| C                            | 0.77        | 0.33 | 0.50 |
| C                            | 0.56        | 0.23 | 0.50 |
| C                            | 0.67        | 0.44 | 0.50 |
| C                            | 0.39        | 0.78 | 0.50 |
| C                            | 0.22        | 0.61 | 0.50 |
| C                            | 0.39        | 0.61 | 0.50 |
| C                            | 0.78        | 0.39 | 0.50 |
| C                            | 0.61        | 0.22 | 0.50 |
| C                            | 0.61        | 0.39 | 0.50 |
| C                            | 0.44        | 0.83 | 0.50 |
| C                            | 0.17        | 0.61 | 0.50 |
| C                            | 0.39        | 0.56 | 0.50 |
| C                            | 0.83        | 0.44 | 0.50 |
| C                            | 0.61        | 0.17 | 0.50 |
| C                            | 0.56        | 0.39 | 0.50 |
| C                            | 0.44        | 0.88 | 0.50 |
| C                            | 0.12        | 0.56 | 0.50 |
| C                            | 0.44        | 0.56 | 0.50 |
| C                            | 0.88        | 0.44 | 0.50 |

---

|   |      |      |      |
|---|------|------|------|
| C | 0.56 | 0.12 | 0.50 |
| C | 0.56 | 0.44 | 0.50 |
| C | 0.39 | 0.72 | 0.50 |
| C | 0.28 | 0.67 | 0.50 |
| C | 0.33 | 0.61 | 0.50 |
| C | 0.72 | 0.39 | 0.50 |
| C | 0.67 | 0.28 | 0.50 |
| C | 0.61 | 0.33 | 0.50 |
| N | 0.28 | 0.72 | 0.50 |
| N | 0.28 | 0.56 | 0.50 |
| N | 0.44 | 0.72 | 0.50 |
| N | 0.72 | 0.28 | 0.50 |
| N | 0.56 | 0.28 | 0.50 |
| N | 0.72 | 0.44 | 0.50 |
| N | 0.39 | 0.94 | 0.50 |
| N | 0.06 | 0.45 | 0.50 |
| N | 0.55 | 0.61 | 0.50 |
| N | 0.94 | 0.39 | 0.50 |
| N | 0.45 | 0.06 | 0.50 |
| N | 0.61 | 0.55 | 0.50 |
| N | 0.49 | 0.94 | 0.50 |
| N | 0.06 | 0.55 | 0.50 |
| N | 0.45 | 0.51 | 0.50 |
| N | 0.94 | 0.49 | 0.50 |
| N | 0.55 | 0.06 | 0.50 |
| N | 0.51 | 0.45 | 0.50 |
| N | 0.33 | 0.67 | 0.50 |
| N | 0.67 | 0.33 | 0.50 |
| H | 0.29 | 0.83 | 0.50 |
| H | 0.17 | 0.46 | 0.50 |
| H | 0.54 | 0.71 | 0.50 |
| H | 0.83 | 0.29 | 0.50 |
| H | 0.46 | 0.17 | 0.50 |
| H | 0.71 | 0.54 | 0.50 |
| H | 0.49 | 0.83 | 0.50 |
| H | 0.17 | 0.66 | 0.50 |
| H | 0.34 | 0.51 | 0.50 |

---

---

|    |      |      |      |
|----|------|------|------|
| H  | 0.83 | 0.49 | 0.50 |
| H  | 0.66 | 0.17 | 0.50 |
| H  | 0.51 | 0.34 | 0.50 |
| H  | 0.59 | 0.65 | 0.50 |
| H  | 0.35 | 0.94 | 0.50 |
| H  | 0.06 | 0.41 | 0.50 |
| H  | 0.65 | 0.59 | 0.50 |
| H  | 0.94 | 0.35 | 0.50 |
| H  | 0.41 | 0.06 | 0.50 |
| H  | 0.41 | 0.47 | 0.50 |
| H  | 0.53 | 0.94 | 0.50 |
| H  | 0.06 | 0.59 | 0.50 |
| H  | 0.47 | 0.41 | 0.50 |
| H  | 0.94 | 0.53 | 0.50 |
| H  | 0.59 | 0.06 | 0.50 |
| Co | 0.53 | 0.53 | 0.50 |
| Co | 0.47 | 0.00 | 0.50 |
| Co | 0.00 | 0.47 | 0.50 |

---

**Table S4.** Structural information of the identified Ni<sub>3</sub>(HITT)<sub>2</sub>.

| Ni <sub>3</sub> (HITT) <sub>2</sub> | Coordinates |      |      |
|-------------------------------------|-------------|------|------|
| C                                   | 0.39        | 0.88 | 0.50 |
| C                                   | 0.12        | 0.50 | 0.50 |
| C                                   | 0.50        | 0.61 | 0.50 |
| C                                   | 0.88        | 0.39 | 0.50 |
| C                                   | 0.50        | 0.12 | 0.50 |
| C                                   | 0.61        | 0.50 | 0.50 |
| C                                   | 0.33        | 0.83 | 0.50 |
| C                                   | 0.17        | 0.50 | 0.50 |
| C                                   | 0.50        | 0.67 | 0.50 |
| C                                   | 0.83        | 0.33 | 0.50 |
| C                                   | 0.50        | 0.17 | 0.50 |
| C                                   | 0.67        | 0.50 | 0.50 |
| C                                   | 0.33        | 0.77 | 0.50 |
| C                                   | 0.23        | 0.56 | 0.50 |
| C                                   | 0.44        | 0.67 | 0.50 |
| C                                   | 0.77        | 0.33 | 0.50 |
| C                                   | 0.56        | 0.23 | 0.50 |
| C                                   | 0.67        | 0.44 | 0.50 |
| C                                   | 0.39        | 0.78 | 0.50 |
| C                                   | 0.22        | 0.61 | 0.50 |
| C                                   | 0.39        | 0.61 | 0.50 |
| C                                   | 0.78        | 0.39 | 0.50 |
| C                                   | 0.61        | 0.22 | 0.50 |
| C                                   | 0.61        | 0.39 | 0.50 |
| C                                   | 0.44        | 0.83 | 0.50 |
| C                                   | 0.17        | 0.61 | 0.50 |
| C                                   | 0.39        | 0.56 | 0.50 |
| C                                   | 0.83        | 0.44 | 0.50 |
| C                                   | 0.61        | 0.17 | 0.50 |
| C                                   | 0.56        | 0.39 | 0.50 |
| C                                   | 0.44        | 0.88 | 0.50 |
| C                                   | 0.12        | 0.56 | 0.50 |
| C                                   | 0.44        | 0.56 | 0.50 |
| C                                   | 0.88        | 0.44 | 0.50 |

---

|   |      |      |      |
|---|------|------|------|
| C | 0.56 | 0.12 | 0.50 |
| C | 0.56 | 0.44 | 0.50 |
| C | 0.39 | 0.72 | 0.50 |
| C | 0.28 | 0.67 | 0.50 |
| C | 0.33 | 0.61 | 0.50 |
| C | 0.72 | 0.39 | 0.50 |
| C | 0.67 | 0.28 | 0.50 |
| C | 0.61 | 0.33 | 0.50 |
| N | 0.28 | 0.72 | 0.50 |
| N | 0.28 | 0.56 | 0.50 |
| N | 0.44 | 0.72 | 0.50 |
| N | 0.72 | 0.28 | 0.50 |
| N | 0.56 | 0.28 | 0.50 |
| N | 0.72 | 0.44 | 0.50 |
| N | 0.39 | 0.94 | 0.50 |
| N | 0.06 | 0.45 | 0.50 |
| N | 0.55 | 0.61 | 0.50 |
| N | 0.94 | 0.39 | 0.50 |
| N | 0.45 | 0.06 | 0.50 |
| N | 0.61 | 0.55 | 0.50 |
| N | 0.49 | 0.94 | 0.50 |
| N | 0.06 | 0.55 | 0.50 |
| N | 0.45 | 0.51 | 0.50 |
| N | 0.94 | 0.49 | 0.50 |
| N | 0.55 | 0.06 | 0.50 |
| N | 0.51 | 0.45 | 0.50 |
| N | 0.33 | 0.67 | 0.50 |
| N | 0.67 | 0.33 | 0.50 |
| H | 0.29 | 0.83 | 0.50 |
| H | 0.17 | 0.46 | 0.50 |
| H | 0.54 | 0.71 | 0.50 |
| H | 0.83 | 0.29 | 0.50 |
| H | 0.46 | 0.17 | 0.50 |
| H | 0.71 | 0.54 | 0.50 |
| H | 0.49 | 0.83 | 0.50 |
| H | 0.17 | 0.66 | 0.50 |
| H | 0.34 | 0.51 | 0.50 |

---

---

|    |      |      |      |
|----|------|------|------|
| H  | 0.83 | 0.49 | 0.50 |
| H  | 0.66 | 0.17 | 0.50 |
| H  | 0.51 | 0.34 | 0.50 |
| H  | 0.59 | 0.65 | 0.50 |
| H  | 0.35 | 0.94 | 0.50 |
| H  | 0.06 | 0.41 | 0.50 |
| H  | 0.65 | 0.59 | 0.50 |
| H  | 0.94 | 0.35 | 0.50 |
| H  | 0.41 | 0.06 | 0.50 |
| H  | 0.41 | 0.47 | 0.50 |
| H  | 0.53 | 0.94 | 0.50 |
| H  | 0.06 | 0.59 | 0.50 |
| H  | 0.47 | 0.41 | 0.50 |
| H  | 0.94 | 0.53 | 0.50 |
| H  | 0.59 | 0.06 | 0.50 |
| Ni | 0.53 | 0.53 | 0.50 |
| Ni | 0.47 | 0.00 | 0.50 |
| Ni | 0.00 | 0.47 | 0.50 |

---

**Table S5.** Structural information of the identified Ru<sub>3</sub>(HITT)<sub>2</sub>.

| Ru <sub>3</sub> (HITT) <sub>2</sub> | Coordinates |      |      |
|-------------------------------------|-------------|------|------|
| C                                   | 0.38        | 0.88 | 0.50 |
| C                                   | 0.12        | 0.50 | 0.50 |
| C                                   | 0.50        | 0.62 | 0.50 |
| C                                   | 0.88        | 0.38 | 0.50 |
| C                                   | 0.50        | 0.12 | 0.50 |
| C                                   | 0.62        | 0.50 | 0.50 |
| C                                   | 0.33        | 0.82 | 0.50 |
| C                                   | 0.18        | 0.50 | 0.50 |
| C                                   | 0.50        | 0.67 | 0.50 |
| C                                   | 0.82        | 0.33 | 0.50 |
| C                                   | 0.50        | 0.18 | 0.50 |
| C                                   | 0.67        | 0.50 | 0.50 |
| C                                   | 0.33        | 0.77 | 0.50 |
| C                                   | 0.23        | 0.56 | 0.50 |
| C                                   | 0.44        | 0.67 | 0.50 |
| C                                   | 0.77        | 0.33 | 0.50 |
| C                                   | 0.56        | 0.23 | 0.50 |
| C                                   | 0.67        | 0.44 | 0.50 |
| C                                   | 0.39        | 0.77 | 0.50 |
| C                                   | 0.23        | 0.61 | 0.50 |
| C                                   | 0.39        | 0.61 | 0.50 |
| C                                   | 0.77        | 0.39 | 0.50 |
| C                                   | 0.61        | 0.23 | 0.50 |
| C                                   | 0.61        | 0.39 | 0.50 |
| C                                   | 0.44        | 0.83 | 0.50 |
| C                                   | 0.17        | 0.61 | 0.50 |
| C                                   | 0.39        | 0.56 | 0.50 |
| C                                   | 0.83        | 0.44 | 0.50 |
| C                                   | 0.61        | 0.17 | 0.50 |
| C                                   | 0.56        | 0.39 | 0.50 |
| C                                   | 0.44        | 0.88 | 0.50 |
| C                                   | 0.12        | 0.56 | 0.50 |
| C                                   | 0.44        | 0.56 | 0.50 |
| C                                   | 0.88        | 0.44 | 0.50 |

---

|   |      |      |      |
|---|------|------|------|
| C | 0.56 | 0.12 | 0.50 |
| C | 0.56 | 0.44 | 0.50 |
| C | 0.39 | 0.72 | 0.50 |
| C | 0.28 | 0.67 | 0.50 |
| C | 0.33 | 0.61 | 0.50 |
| C | 0.72 | 0.39 | 0.50 |
| C | 0.67 | 0.28 | 0.50 |
| C | 0.61 | 0.33 | 0.50 |
| N | 0.28 | 0.72 | 0.50 |
| N | 0.28 | 0.56 | 0.50 |
| N | 0.44 | 0.72 | 0.50 |
| N | 0.72 | 0.28 | 0.50 |
| N | 0.56 | 0.28 | 0.50 |
| N | 0.72 | 0.44 | 0.50 |
| N | 0.39 | 0.93 | 0.50 |
| N | 0.07 | 0.45 | 0.50 |
| N | 0.55 | 0.61 | 0.50 |
| N | 0.93 | 0.39 | 0.50 |
| N | 0.45 | 0.07 | 0.50 |
| N | 0.61 | 0.55 | 0.50 |
| N | 0.48 | 0.94 | 0.50 |
| N | 0.06 | 0.55 | 0.50 |
| N | 0.45 | 0.52 | 0.50 |
| N | 0.94 | 0.48 | 0.50 |
| N | 0.55 | 0.06 | 0.50 |
| N | 0.52 | 0.45 | 0.50 |
| N | 0.33 | 0.67 | 0.50 |
| N | 0.67 | 0.33 | 0.50 |
| H | 0.28 | 0.82 | 0.50 |
| H | 0.18 | 0.46 | 0.50 |
| H | 0.54 | 0.72 | 0.50 |
| H | 0.82 | 0.28 | 0.50 |
| H | 0.46 | 0.18 | 0.50 |
| H | 0.72 | 0.54 | 0.50 |
| H | 0.48 | 0.83 | 0.50 |
| H | 0.17 | 0.65 | 0.50 |
| H | 0.35 | 0.52 | 0.50 |

---

---

|    |      |      |      |
|----|------|------|------|
| H  | 0.83 | 0.48 | 0.50 |
| H  | 0.65 | 0.17 | 0.50 |
| H  | 0.52 | 0.35 | 0.50 |
| H  | 0.59 | 0.65 | 0.50 |
| H  | 0.35 | 0.93 | 0.50 |
| H  | 0.07 | 0.41 | 0.50 |
| H  | 0.65 | 0.59 | 0.50 |
| H  | 0.93 | 0.35 | 0.50 |
| H  | 0.41 | 0.07 | 0.50 |
| H  | 0.41 | 0.48 | 0.50 |
| H  | 0.52 | 0.94 | 0.50 |
| H  | 0.06 | 0.59 | 0.50 |
| H  | 0.48 | 0.41 | 0.50 |
| H  | 0.94 | 0.52 | 0.50 |
| H  | 0.59 | 0.06 | 0.50 |
| Ru | 0.53 | 0.53 | 0.50 |
| Ru | 0.47 | 0.00 | 0.50 |
| Ru | 0.00 | 0.47 | 0.50 |

---

**Table S6.** Structural information of the identified Rh<sub>3</sub>(HITT)<sub>2</sub>.

| Rh <sub>3</sub> (HITT) <sub>2</sub> | Coordinates |      |      |
|-------------------------------------|-------------|------|------|
| C                                   | 0.38        | 0.88 | 0.50 |
| C                                   | 0.12        | 0.50 | 0.50 |
| C                                   | 0.50        | 0.62 | 0.50 |
| C                                   | 0.88        | 0.38 | 0.50 |
| C                                   | 0.50        | 0.12 | 0.50 |
| C                                   | 0.62        | 0.50 | 0.50 |
| C                                   | 0.33        | 0.82 | 0.50 |
| C                                   | 0.18        | 0.50 | 0.50 |
| C                                   | 0.50        | 0.67 | 0.50 |
| C                                   | 0.82        | 0.33 | 0.50 |
| C                                   | 0.50        | 0.18 | 0.50 |
| C                                   | 0.67        | 0.50 | 0.50 |
| C                                   | 0.33        | 0.77 | 0.50 |
| C                                   | 0.23        | 0.56 | 0.50 |
| C                                   | 0.44        | 0.67 | 0.50 |
| C                                   | 0.77        | 0.33 | 0.50 |
| C                                   | 0.56        | 0.23 | 0.50 |
| C                                   | 0.67        | 0.44 | 0.50 |
| C                                   | 0.39        | 0.77 | 0.50 |
| C                                   | 0.23        | 0.61 | 0.50 |
| C                                   | 0.39        | 0.61 | 0.50 |
| C                                   | 0.77        | 0.39 | 0.50 |
| C                                   | 0.61        | 0.23 | 0.50 |
| C                                   | 0.61        | 0.39 | 0.50 |
| C                                   | 0.44        | 0.83 | 0.50 |
| C                                   | 0.17        | 0.61 | 0.50 |
| C                                   | 0.39        | 0.56 | 0.50 |
| C                                   | 0.83        | 0.44 | 0.50 |
| C                                   | 0.61        | 0.17 | 0.50 |
| C                                   | 0.56        | 0.39 | 0.50 |
| C                                   | 0.44        | 0.88 | 0.50 |
| C                                   | 0.12        | 0.56 | 0.50 |
| C                                   | 0.44        | 0.56 | 0.50 |
| C                                   | 0.88        | 0.44 | 0.50 |

---

|   |      |      |      |
|---|------|------|------|
| C | 0.56 | 0.12 | 0.50 |
| C | 0.56 | 0.44 | 0.50 |
| C | 0.39 | 0.72 | 0.50 |
| C | 0.28 | 0.67 | 0.50 |
| C | 0.33 | 0.61 | 0.50 |
| C | 0.72 | 0.39 | 0.50 |
| C | 0.67 | 0.28 | 0.50 |
| C | 0.61 | 0.33 | 0.50 |
| N | 0.28 | 0.72 | 0.50 |
| N | 0.28 | 0.56 | 0.50 |
| N | 0.44 | 0.72 | 0.50 |
| N | 0.72 | 0.28 | 0.50 |
| N | 0.56 | 0.28 | 0.50 |
| N | 0.72 | 0.44 | 0.50 |
| N | 0.39 | 0.93 | 0.50 |
| N | 0.07 | 0.45 | 0.50 |
| N | 0.55 | 0.61 | 0.50 |
| N | 0.93 | 0.39 | 0.50 |
| N | 0.45 | 0.07 | 0.50 |
| N | 0.61 | 0.55 | 0.50 |
| N | 0.49 | 0.94 | 0.50 |
| N | 0.06 | 0.55 | 0.50 |
| N | 0.45 | 0.51 | 0.50 |
| N | 0.94 | 0.49 | 0.50 |
| N | 0.55 | 0.06 | 0.50 |
| N | 0.51 | 0.45 | 0.50 |
| N | 0.33 | 0.67 | 0.50 |
| N | 0.67 | 0.33 | 0.50 |
| H | 0.29 | 0.82 | 0.50 |
| H | 0.18 | 0.46 | 0.50 |
| H | 0.54 | 0.71 | 0.50 |
| H | 0.82 | 0.29 | 0.50 |
| H | 0.46 | 0.18 | 0.50 |
| H | 0.71 | 0.54 | 0.50 |
| H | 0.48 | 0.83 | 0.50 |
| H | 0.17 | 0.65 | 0.50 |
| H | 0.35 | 0.52 | 0.50 |

---

---

|    |      |      |      |
|----|------|------|------|
| H  | 0.83 | 0.48 | 0.50 |
| H  | 0.65 | 0.17 | 0.50 |
| H  | 0.52 | 0.35 | 0.50 |
| H  | 0.59 | 0.65 | 0.50 |
| H  | 0.35 | 0.93 | 0.50 |
| H  | 0.07 | 0.41 | 0.50 |
| H  | 0.65 | 0.59 | 0.50 |
| H  | 0.93 | 0.35 | 0.50 |
| H  | 0.41 | 0.07 | 0.50 |
| H  | 0.41 | 0.47 | 0.50 |
| H  | 0.53 | 0.94 | 0.50 |
| H  | 0.06 | 0.59 | 0.50 |
| H  | 0.47 | 0.41 | 0.50 |
| H  | 0.94 | 0.53 | 0.50 |
| H  | 0.59 | 0.06 | 0.50 |
| Rh | 0.53 | 0.53 | 0.50 |
| Rh | 0.47 | 0.00 | 0.50 |
| Rh | 0.00 | 0.47 | 0.50 |

---

**Table S7.** Structural information of the identified Pd<sub>3</sub>(HITT)<sub>2</sub>.

| Pd <sub>3</sub> (HITT) <sub>2</sub> | Coordinates |      |      |
|-------------------------------------|-------------|------|------|
| C                                   | 0.38        | 0.88 | 0.50 |
| C                                   | 0.12        | 0.50 | 0.50 |
| C                                   | 0.50        | 0.62 | 0.50 |
| C                                   | 0.88        | 0.38 | 0.50 |
| C                                   | 0.50        | 0.12 | 0.50 |
| C                                   | 0.62        | 0.50 | 0.50 |
| C                                   | 0.33        | 0.83 | 0.50 |
| C                                   | 0.17        | 0.51 | 0.50 |
| C                                   | 0.49        | 0.67 | 0.50 |
| C                                   | 0.83        | 0.33 | 0.50 |
| C                                   | 0.51        | 0.17 | 0.50 |
| C                                   | 0.67        | 0.49 | 0.50 |
| C                                   | 0.33        | 0.77 | 0.50 |
| C                                   | 0.23        | 0.56 | 0.50 |
| C                                   | 0.44        | 0.67 | 0.50 |
| C                                   | 0.77        | 0.33 | 0.50 |
| C                                   | 0.56        | 0.23 | 0.50 |
| C                                   | 0.67        | 0.44 | 0.50 |
| C                                   | 0.39        | 0.77 | 0.50 |
| C                                   | 0.23        | 0.61 | 0.50 |
| C                                   | 0.39        | 0.61 | 0.50 |
| C                                   | 0.77        | 0.39 | 0.50 |
| C                                   | 0.61        | 0.23 | 0.50 |
| C                                   | 0.61        | 0.39 | 0.50 |
| C                                   | 0.44        | 0.83 | 0.50 |
| C                                   | 0.17        | 0.61 | 0.50 |
| C                                   | 0.39        | 0.56 | 0.50 |
| C                                   | 0.83        | 0.44 | 0.50 |
| C                                   | 0.61        | 0.17 | 0.50 |
| C                                   | 0.56        | 0.39 | 0.50 |
| C                                   | 0.44        | 0.88 | 0.50 |
| C                                   | 0.12        | 0.56 | 0.50 |
| C                                   | 0.44        | 0.56 | 0.50 |
| C                                   | 0.88        | 0.44 | 0.50 |

---

|   |      |      |      |
|---|------|------|------|
| C | 0.56 | 0.12 | 0.50 |
| C | 0.56 | 0.44 | 0.50 |
| C | 0.39 | 0.72 | 0.50 |
| C | 0.28 | 0.67 | 0.50 |
| C | 0.33 | 0.61 | 0.50 |
| C | 0.72 | 0.39 | 0.50 |
| C | 0.67 | 0.28 | 0.50 |
| C | 0.61 | 0.33 | 0.50 |
| N | 0.28 | 0.72 | 0.50 |
| N | 0.28 | 0.56 | 0.50 |
| N | 0.44 | 0.72 | 0.50 |
| N | 0.72 | 0.28 | 0.50 |
| N | 0.56 | 0.28 | 0.50 |
| N | 0.72 | 0.44 | 0.50 |
| N | 0.39 | 0.93 | 0.50 |
| N | 0.07 | 0.46 | 0.50 |
| N | 0.54 | 0.61 | 0.50 |
| N | 0.93 | 0.39 | 0.50 |
| N | 0.46 | 0.07 | 0.50 |
| N | 0.61 | 0.54 | 0.50 |
| N | 0.49 | 0.93 | 0.50 |
| N | 0.07 | 0.55 | 0.50 |
| N | 0.45 | 0.51 | 0.50 |
| N | 0.93 | 0.49 | 0.50 |
| N | 0.55 | 0.07 | 0.50 |
| N | 0.51 | 0.45 | 0.50 |
| N | 0.33 | 0.67 | 0.50 |
| N | 0.67 | 0.33 | 0.50 |
| H | 0.29 | 0.82 | 0.50 |
| H | 0.18 | 0.46 | 0.50 |
| H | 0.54 | 0.71 | 0.50 |
| H | 0.82 | 0.29 | 0.50 |
| H | 0.46 | 0.18 | 0.50 |
| H | 0.71 | 0.54 | 0.50 |
| H | 0.48 | 0.83 | 0.50 |
| H | 0.17 | 0.66 | 0.50 |
| H | 0.34 | 0.52 | 0.50 |

---

---

|    |      |      |      |
|----|------|------|------|
| H  | 0.83 | 0.48 | 0.50 |
| H  | 0.66 | 0.17 | 0.50 |
| H  | 0.52 | 0.34 | 0.50 |
| H  | 0.58 | 0.65 | 0.50 |
| H  | 0.35 | 0.93 | 0.50 |
| H  | 0.07 | 0.42 | 0.50 |
| H  | 0.65 | 0.58 | 0.50 |
| H  | 0.93 | 0.35 | 0.50 |
| H  | 0.42 | 0.07 | 0.50 |
| H  | 0.41 | 0.47 | 0.50 |
| H  | 0.53 | 0.94 | 0.50 |
| H  | 0.06 | 0.59 | 0.50 |
| H  | 0.47 | 0.41 | 0.50 |
| H  | 0.94 | 0.53 | 0.50 |
| H  | 0.59 | 0.06 | 0.50 |
| Pd | 0.53 | 0.53 | 0.50 |
| Pd | 0.47 | 0.00 | 0.50 |
| Pd | 0.00 | 0.47 | 0.50 |

---

**Table S8.** Structural information of the identified Os<sub>3</sub>(HITT)<sub>2</sub>.

| Os <sub>3</sub> (HITT) <sub>2</sub> | Coordinates |      |      |
|-------------------------------------|-------------|------|------|
| C                                   | 0.38        | 0.88 | 0.50 |
| C                                   | 0.12        | 0.50 | 0.50 |
| C                                   | 0.50        | 0.62 | 0.50 |
| C                                   | 0.88        | 0.38 | 0.50 |
| C                                   | 0.50        | 0.12 | 0.50 |
| C                                   | 0.62        | 0.50 | 0.50 |
| C                                   | 0.33        | 0.82 | 0.50 |
| C                                   | 0.18        | 0.50 | 0.50 |
| C                                   | 0.50        | 0.67 | 0.50 |
| C                                   | 0.82        | 0.33 | 0.50 |
| C                                   | 0.50        | 0.18 | 0.50 |
| C                                   | 0.67        | 0.50 | 0.50 |
| C                                   | 0.33        | 0.77 | 0.50 |
| C                                   | 0.23        | 0.56 | 0.50 |
| C                                   | 0.44        | 0.67 | 0.50 |
| C                                   | 0.77        | 0.33 | 0.50 |
| C                                   | 0.56        | 0.23 | 0.50 |
| C                                   | 0.67        | 0.44 | 0.50 |
| C                                   | 0.39        | 0.77 | 0.50 |
| C                                   | 0.23        | 0.61 | 0.50 |
| C                                   | 0.39        | 0.61 | 0.50 |
| C                                   | 0.77        | 0.39 | 0.50 |
| C                                   | 0.61        | 0.23 | 0.50 |
| C                                   | 0.61        | 0.39 | 0.50 |
| C                                   | 0.44        | 0.83 | 0.50 |
| C                                   | 0.17        | 0.61 | 0.50 |
| C                                   | 0.39        | 0.56 | 0.50 |
| C                                   | 0.83        | 0.44 | 0.50 |
| C                                   | 0.61        | 0.17 | 0.50 |
| C                                   | 0.56        | 0.39 | 0.50 |
| C                                   | 0.44        | 0.88 | 0.50 |
| C                                   | 0.12        | 0.56 | 0.50 |
| C                                   | 0.44        | 0.56 | 0.50 |
| C                                   | 0.88        | 0.44 | 0.50 |

---

|   |      |      |      |
|---|------|------|------|
| C | 0.56 | 0.12 | 0.50 |
| C | 0.56 | 0.44 | 0.50 |
| C | 0.39 | 0.72 | 0.50 |
| C | 0.28 | 0.67 | 0.50 |
| C | 0.33 | 0.61 | 0.50 |
| C | 0.72 | 0.39 | 0.50 |
| C | 0.67 | 0.28 | 0.50 |
| C | 0.61 | 0.33 | 0.50 |
| N | 0.28 | 0.72 | 0.50 |
| N | 0.28 | 0.56 | 0.50 |
| N | 0.44 | 0.72 | 0.50 |
| N | 0.72 | 0.28 | 0.50 |
| N | 0.56 | 0.28 | 0.50 |
| N | 0.72 | 0.44 | 0.50 |
| N | 0.39 | 0.93 | 0.50 |
| N | 0.07 | 0.45 | 0.50 |
| N | 0.55 | 0.61 | 0.50 |
| N | 0.93 | 0.39 | 0.50 |
| N | 0.45 | 0.07 | 0.50 |
| N | 0.61 | 0.55 | 0.50 |
| N | 0.48 | 0.94 | 0.50 |
| N | 0.06 | 0.55 | 0.50 |
| N | 0.45 | 0.52 | 0.50 |
| N | 0.94 | 0.48 | 0.50 |
| N | 0.55 | 0.06 | 0.50 |
| N | 0.52 | 0.45 | 0.50 |
| N | 0.33 | 0.67 | 0.50 |
| N | 0.67 | 0.33 | 0.50 |
| H | 0.29 | 0.82 | 0.50 |
| H | 0.18 | 0.46 | 0.50 |
| H | 0.54 | 0.71 | 0.50 |
| H | 0.82 | 0.29 | 0.50 |
| H | 0.46 | 0.18 | 0.50 |
| H | 0.71 | 0.54 | 0.50 |
| H | 0.48 | 0.83 | 0.50 |
| H | 0.17 | 0.65 | 0.50 |
| H | 0.35 | 0.52 | 0.50 |

---

---

|    |      |      |      |
|----|------|------|------|
| H  | 0.83 | 0.48 | 0.50 |
| H  | 0.65 | 0.17 | 0.50 |
| H  | 0.52 | 0.35 | 0.50 |
| H  | 0.59 | 0.65 | 0.50 |
| H  | 0.35 | 0.93 | 0.50 |
| H  | 0.07 | 0.41 | 0.50 |
| H  | 0.65 | 0.59 | 0.50 |
| H  | 0.93 | 0.35 | 0.50 |
| H  | 0.41 | 0.07 | 0.50 |
| H  | 0.41 | 0.47 | 0.50 |
| H  | 0.53 | 0.94 | 0.50 |
| H  | 0.06 | 0.59 | 0.50 |
| H  | 0.47 | 0.41 | 0.50 |
| H  | 0.94 | 0.53 | 0.50 |
| H  | 0.59 | 0.06 | 0.50 |
| Os | 0.53 | 0.53 | 0.50 |
| Os | 0.47 | 0.00 | 0.50 |
| Os | 0.00 | 0.47 | 0.50 |

---

**Table S9.** Structural information of the identified Ir<sub>3</sub>(HITT)<sub>2</sub>.

| Ir <sub>3</sub> (HITT) <sub>2</sub> | Coordinates |      |      |
|-------------------------------------|-------------|------|------|
| C                                   | 0.38        | 0.88 | 0.50 |
| C                                   | 0.12        | 0.50 | 0.50 |
| C                                   | 0.50        | 0.62 | 0.50 |
| C                                   | 0.88        | 0.38 | 0.50 |
| C                                   | 0.50        | 0.12 | 0.50 |
| C                                   | 0.62        | 0.50 | 0.50 |
| C                                   | 0.33        | 0.82 | 0.50 |
| C                                   | 0.18        | 0.50 | 0.50 |
| C                                   | 0.50        | 0.67 | 0.50 |
| C                                   | 0.82        | 0.33 | 0.50 |
| C                                   | 0.50        | 0.18 | 0.50 |
| C                                   | 0.67        | 0.50 | 0.50 |
| C                                   | 0.33        | 0.77 | 0.50 |
| C                                   | 0.23        | 0.56 | 0.50 |
| C                                   | 0.44        | 0.67 | 0.50 |
| C                                   | 0.77        | 0.33 | 0.50 |
| C                                   | 0.56        | 0.23 | 0.50 |
| C                                   | 0.67        | 0.44 | 0.50 |
| C                                   | 0.39        | 0.77 | 0.50 |
| C                                   | 0.23        | 0.61 | 0.50 |
| C                                   | 0.39        | 0.61 | 0.50 |
| C                                   | 0.77        | 0.39 | 0.50 |
| C                                   | 0.61        | 0.23 | 0.50 |
| C                                   | 0.61        | 0.39 | 0.50 |
| C                                   | 0.44        | 0.83 | 0.50 |
| C                                   | 0.17        | 0.61 | 0.50 |
| C                                   | 0.39        | 0.56 | 0.50 |
| C                                   | 0.83        | 0.44 | 0.50 |
| C                                   | 0.61        | 0.17 | 0.50 |
| C                                   | 0.56        | 0.39 | 0.50 |
| C                                   | 0.44        | 0.88 | 0.50 |
| C                                   | 0.12        | 0.56 | 0.50 |
| C                                   | 0.44        | 0.56 | 0.50 |
| C                                   | 0.88        | 0.44 | 0.50 |

---

|   |      |      |      |
|---|------|------|------|
| C | 0.56 | 0.12 | 0.50 |
| C | 0.56 | 0.44 | 0.50 |
| C | 0.39 | 0.72 | 0.50 |
| C | 0.28 | 0.67 | 0.50 |
| C | 0.33 | 0.61 | 0.50 |
| C | 0.72 | 0.39 | 0.50 |
| C | 0.67 | 0.28 | 0.50 |
| C | 0.61 | 0.33 | 0.50 |
| N | 0.28 | 0.72 | 0.50 |
| N | 0.28 | 0.56 | 0.50 |
| N | 0.44 | 0.72 | 0.50 |
| N | 0.72 | 0.28 | 0.50 |
| N | 0.56 | 0.28 | 0.50 |
| N | 0.72 | 0.44 | 0.50 |
| N | 0.39 | 0.93 | 0.50 |
| N | 0.07 | 0.45 | 0.50 |
| N | 0.55 | 0.61 | 0.50 |
| N | 0.93 | 0.39 | 0.50 |
| N | 0.45 | 0.07 | 0.50 |
| N | 0.61 | 0.55 | 0.50 |
| N | 0.48 | 0.94 | 0.50 |
| N | 0.06 | 0.55 | 0.50 |
| N | 0.45 | 0.52 | 0.50 |
| N | 0.94 | 0.48 | 0.50 |
| N | 0.55 | 0.06 | 0.50 |
| N | 0.52 | 0.45 | 0.50 |
| N | 0.33 | 0.67 | 0.50 |
| N | 0.67 | 0.33 | 0.50 |
| H | 0.29 | 0.82 | 0.50 |
| H | 0.18 | 0.46 | 0.50 |
| H | 0.54 | 0.71 | 0.50 |
| H | 0.82 | 0.29 | 0.50 |
| H | 0.46 | 0.18 | 0.50 |
| H | 0.71 | 0.54 | 0.50 |
| H | 0.48 | 0.83 | 0.50 |
| H | 0.17 | 0.65 | 0.50 |
| H | 0.35 | 0.52 | 0.50 |

---

---

|    |      |      |      |
|----|------|------|------|
| H  | 0.83 | 0.48 | 0.50 |
| H  | 0.65 | 0.17 | 0.50 |
| H  | 0.52 | 0.35 | 0.50 |
| H  | 0.59 | 0.65 | 0.50 |
| H  | 0.35 | 0.93 | 0.50 |
| H  | 0.07 | 0.41 | 0.50 |
| H  | 0.65 | 0.59 | 0.50 |
| H  | 0.93 | 0.35 | 0.50 |
| H  | 0.41 | 0.07 | 0.50 |
| H  | 0.41 | 0.47 | 0.50 |
| H  | 0.53 | 0.94 | 0.50 |
| H  | 0.06 | 0.59 | 0.50 |
| H  | 0.47 | 0.41 | 0.50 |
| H  | 0.94 | 0.53 | 0.50 |
| H  | 0.59 | 0.06 | 0.50 |
| Ir | 0.53 | 0.53 | 0.50 |
| Ir | 0.47 | 0.00 | 0.50 |
| Ir | 0.00 | 0.47 | 0.50 |

---

**Table S10.** Structural information of the identified Pt<sub>3</sub>(HITT)<sub>2</sub>.

| Pt <sub>3</sub> (HITT) <sub>2</sub> | Coordinates |      |      |
|-------------------------------------|-------------|------|------|
| C                                   | 0.38        | 0.88 | 0.50 |
| C                                   | 0.12        | 0.50 | 0.50 |
| C                                   | 0.50        | 0.62 | 0.50 |
| C                                   | 0.88        | 0.38 | 0.50 |
| C                                   | 0.50        | 0.12 | 0.50 |
| C                                   | 0.62        | 0.50 | 0.50 |
| C                                   | 0.33        | 0.82 | 0.50 |
| C                                   | 0.18        | 0.51 | 0.50 |
| C                                   | 0.49        | 0.67 | 0.50 |
| C                                   | 0.82        | 0.33 | 0.50 |
| C                                   | 0.51        | 0.18 | 0.50 |
| C                                   | 0.67        | 0.49 | 0.50 |
| C                                   | 0.33        | 0.77 | 0.50 |
| C                                   | 0.23        | 0.56 | 0.50 |
| C                                   | 0.44        | 0.67 | 0.50 |
| C                                   | 0.77        | 0.33 | 0.50 |
| C                                   | 0.56        | 0.23 | 0.50 |
| C                                   | 0.67        | 0.44 | 0.50 |
| C                                   | 0.39        | 0.77 | 0.50 |
| C                                   | 0.23        | 0.61 | 0.50 |
| C                                   | 0.39        | 0.61 | 0.50 |
| C                                   | 0.77        | 0.39 | 0.50 |
| C                                   | 0.61        | 0.23 | 0.50 |
| C                                   | 0.61        | 0.39 | 0.50 |
| C                                   | 0.44        | 0.83 | 0.50 |
| C                                   | 0.17        | 0.61 | 0.50 |
| C                                   | 0.39        | 0.56 | 0.50 |
| C                                   | 0.83        | 0.44 | 0.50 |
| C                                   | 0.61        | 0.17 | 0.50 |
| C                                   | 0.56        | 0.39 | 0.50 |
| C                                   | 0.44        | 0.88 | 0.50 |
| C                                   | 0.12        | 0.56 | 0.50 |
| C                                   | 0.44        | 0.56 | 0.50 |
| C                                   | 0.88        | 0.44 | 0.50 |

---

|   |      |      |      |
|---|------|------|------|
| C | 0.56 | 0.12 | 0.50 |
| C | 0.56 | 0.44 | 0.50 |
| C | 0.39 | 0.72 | 0.50 |
| C | 0.28 | 0.67 | 0.50 |
| C | 0.33 | 0.61 | 0.50 |
| C | 0.72 | 0.39 | 0.50 |
| C | 0.67 | 0.28 | 0.50 |
| C | 0.61 | 0.33 | 0.50 |
| N | 0.28 | 0.72 | 0.50 |
| N | 0.28 | 0.56 | 0.50 |
| N | 0.44 | 0.72 | 0.50 |
| N | 0.72 | 0.28 | 0.50 |
| N | 0.56 | 0.28 | 0.50 |
| N | 0.72 | 0.44 | 0.50 |
| N | 0.39 | 0.93 | 0.50 |
| N | 0.07 | 0.46 | 0.50 |
| N | 0.54 | 0.61 | 0.50 |
| N | 0.93 | 0.39 | 0.50 |
| N | 0.46 | 0.07 | 0.50 |
| N | 0.61 | 0.54 | 0.50 |
| N | 0.49 | 0.93 | 0.50 |
| N | 0.07 | 0.55 | 0.50 |
| N | 0.45 | 0.51 | 0.50 |
| N | 0.93 | 0.49 | 0.50 |
| N | 0.55 | 0.07 | 0.50 |
| N | 0.51 | 0.45 | 0.50 |
| N | 0.33 | 0.67 | 0.50 |
| N | 0.67 | 0.33 | 0.50 |
| H | 0.29 | 0.82 | 0.50 |
| H | 0.18 | 0.47 | 0.50 |
| H | 0.53 | 0.71 | 0.50 |
| H | 0.82 | 0.29 | 0.50 |
| H | 0.47 | 0.18 | 0.50 |
| H | 0.71 | 0.53 | 0.50 |
| H | 0.48 | 0.83 | 0.50 |
| H | 0.17 | 0.66 | 0.50 |
| H | 0.34 | 0.52 | 0.50 |

---

---

|    |      |      |      |
|----|------|------|------|
| H  | 0.83 | 0.48 | 0.50 |
| H  | 0.66 | 0.17 | 0.50 |
| H  | 0.52 | 0.34 | 0.50 |
| H  | 0.58 | 0.65 | 0.50 |
| H  | 0.35 | 0.93 | 0.50 |
| H  | 0.07 | 0.42 | 0.50 |
| H  | 0.65 | 0.58 | 0.50 |
| H  | 0.93 | 0.35 | 0.50 |
| H  | 0.42 | 0.07 | 0.50 |
| H  | 0.41 | 0.47 | 0.50 |
| H  | 0.53 | 0.94 | 0.50 |
| H  | 0.06 | 0.59 | 0.50 |
| H  | 0.47 | 0.41 | 0.50 |
| H  | 0.94 | 0.53 | 0.50 |
| H  | 0.59 | 0.06 | 0.50 |
| Pt | 0.53 | 0.53 | 0.50 |
| Pt | 0.47 | 0.00 | 0.50 |
| Pt | 0.00 | 0.47 | 0.50 |

---

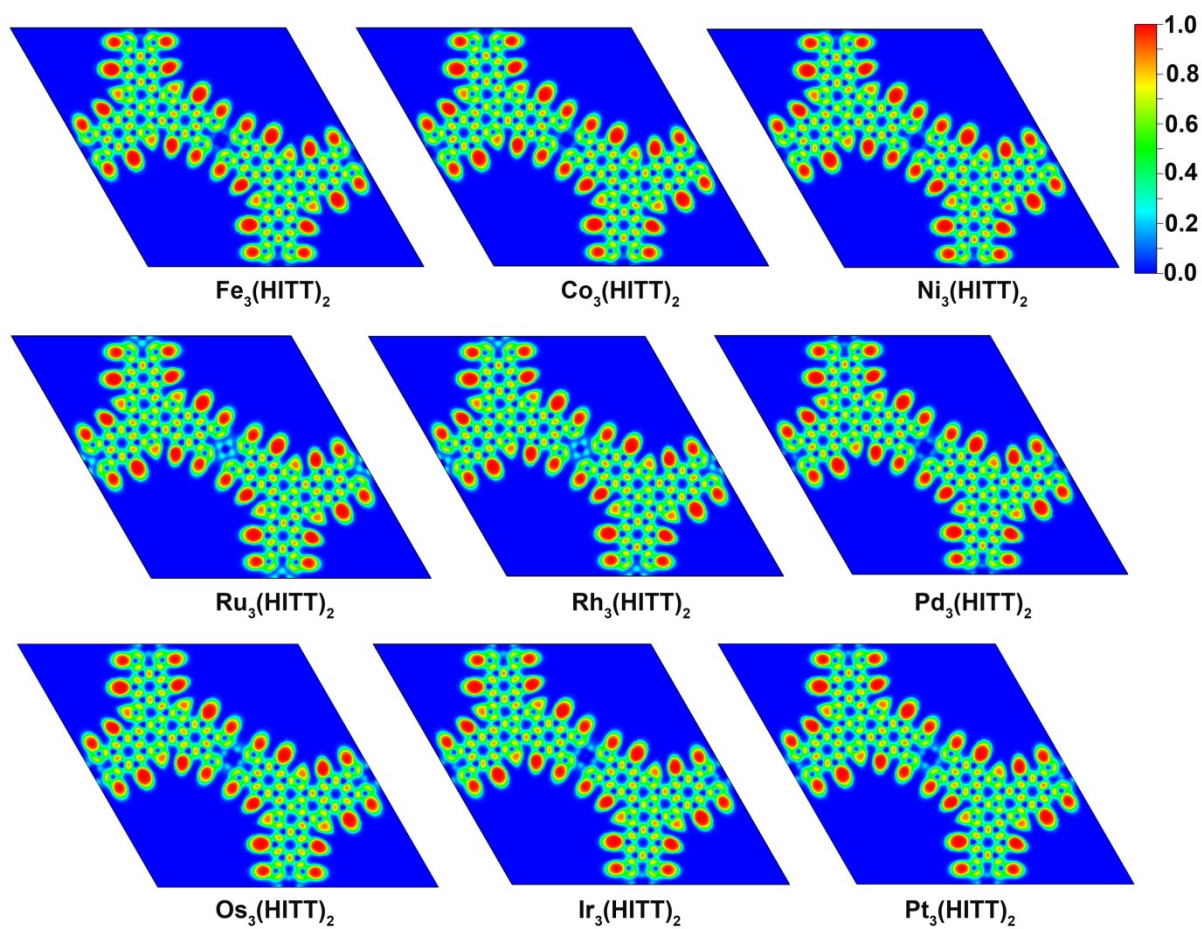

**Figure S1.** Electron localization function (ELF) map of 2  $\text{TM}_3(\text{HITT})_2$ . The isovalues of 0 and 1 represent low and high electron localization, respectively.

**Table S11.** The optimized cohesive energy per atom ( $E_{\text{coh}}$ , eV), and formation energy ( $E_{\text{f}}$ , eV) of 2D  $\text{TM}_3(\text{HITT})_2$ .

| $\text{TM}_3(\text{HITT})_2$ | $E_{\text{coh}}$ (eV) | $E_{\text{form}}$ (eV) |
|------------------------------|-----------------------|------------------------|
| Fe                           | -5.70                 | -0.08                  |
| Co                           | -5.71                 | -0.08                  |
| Ni                           | -5.71                 | -0.13                  |
| Ru                           | -5.72                 | -0.02                  |
| Rh                           | -5.71                 | -0.05                  |
| Pd                           | -5.64                 | -0.05                  |
| Os                           | -5.77                 | -0.03                  |
| Ir                           | -5.76                 | -0.05                  |
| Pt                           | -5.72                 | 0.03                   |

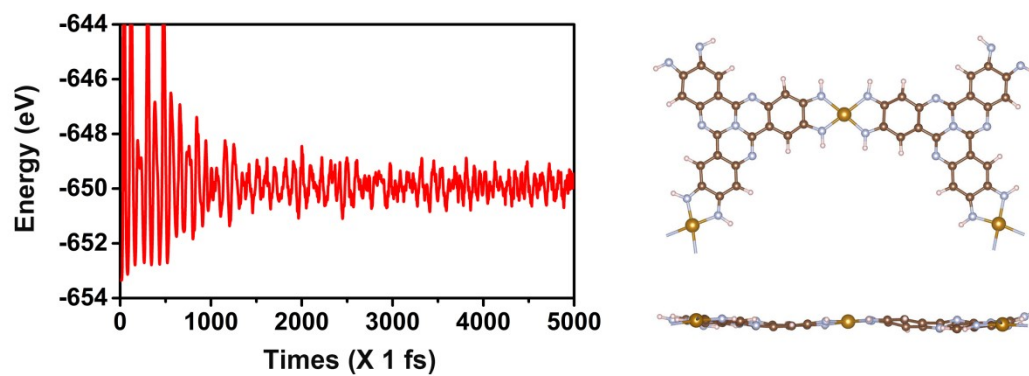

**Figure S2.** Variation of energy of against the time for the *ab initio* molecular dynamics simulations of Rh<sub>3</sub>(HITT)<sub>2</sub>, insert are top and side views of the snapshot of atomic configuration. The simulation is run under 300 K for 5 ps with a time step of 1 fs.

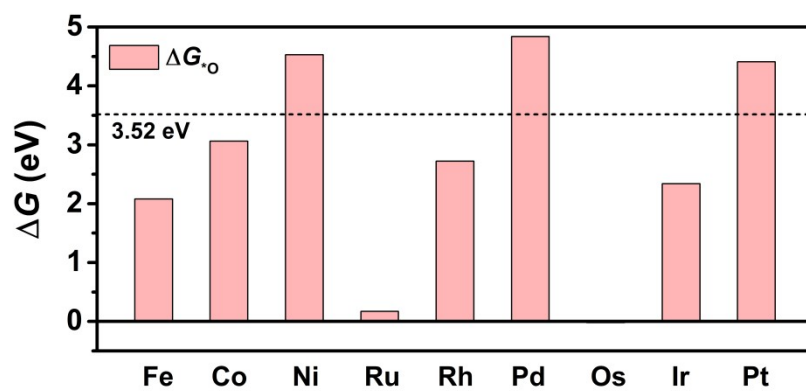

**Figure S3.** The  $\Delta G^\circ$  of different  $\text{TM}_3(\text{HITT})_2$  systems.

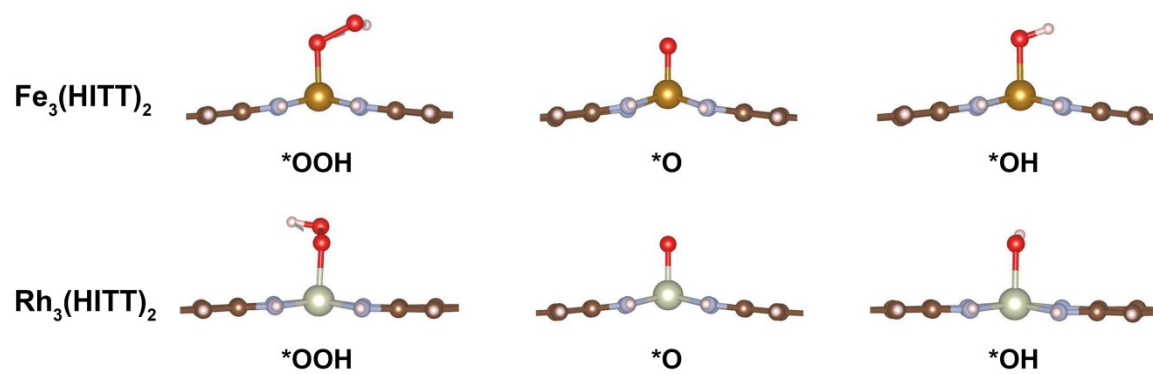

**Figure S4.** Optimized geometric configurations of the key ORR/OER intermediates on the screened  $\text{TM}_3(\text{HITT})_2$  systems.

### Supplementary references

1. T. Lu and F.W. Chen, Revealing the nature of intermolecular interaction and configurational preference of the nonpolar molecular dimers (H<sub>2</sub>)<sub>2</sub>, (N<sub>2</sub>)<sub>2</sub>, and (H<sub>2</sub>)(N<sub>2</sub>). *J. Mol. Model.*, 2013, **19**, 5387–5395.
2. G. Bussi, D. Donadio and M. Parrinello, Canonical sampling through velocity rescaling. *J. Chem. Phys.*, 2007, **126**, 014101.
3. V. Wang, N. Xu, J.C. Liu, G. Tang and W.T. Geng, VASPKIT: A user-friendly interface facilitating high-throughput computing and analysis using VASP code. *Comput. Phys. Commun.*, 2021, **267**, 108033.
4. J.H. Montoya, C. Tsai, A. Vojvodic, J.K. Nørskov, The challenge of electrochemical ammonia synthesis: A new perspective on the role of nitrogen scaling relations, *ChemSusChem*, 2015, **8**, 2180–2186.
5. C. Zhu, C. Wen, C. Wang, M. Zhang, Y. Geng, Z. Su, Elongated heterometal double-sites promote nitrogen reduction on two-dimensional MM'B<sub>7</sub> monolayers, *J. Mater. Chem. A*, 2021, **9**, 10855–10868.
6. T. He, K. Reuter, A. Du, Atomically dispersed asymmetric Cu-B pair on 2D carbon nitride synergistically boosts the conversion of CO into C<sub>2</sub> products, *J. Mater. Chem. A*, 2020, **8**, 599–606.
